# Supplementary material for: A versatile CuII/CuImetal–organic framework for selective sorption and heterogeneous catalysis
Source: Royal Society of Chemistry journal article supplement (doi:10.1039/c5ce01041a), 2015-01-01
Supplement: c5ce01041a1.pdf [file c5ce01041a1.pdf]

## *Supporting Information*

### **A versatile Cu<sup>II</sup>/Cu<sup>I</sup> metal-organic framework for selective sorption and heterogeneous catalysis**

**Yu-Jia Ding,<sup>a</sup> Chun-Pei Zhang,<sup>a</sup> Yong-Qing Wang,<sup>a</sup> Xiao-Ming Lin,<sup>\*a,b</sup> Ximiao Zhu,<sup>a</sup> Xian-Jian Duan<sup>c</sup>, Da-Liang Zhang<sup>b</sup> and Yue-Peng Cai<sup>\*a</sup>**

<sup>a</sup> School of Chemistry and Environment, South China Normal University; Guangzhou Key Laboratory of Materials for Energy Conversion and Storage, Guangzhou 510006, P.R. China.

<sup>b</sup> State Key Laboratory of Inorganic Synthesis and Preparative Chemistry, College of Chemistry, Jilin University, Changchun 130012, P.R. China

<sup>b</sup> Guangzhou GBS High-Tech & Industry Co., Ltd., Guangzhou, 510663, PR China.

#### **Contents**

**Table S1.** Selected bond lengths (Å) and bond angles (°) for **1**

**Figure S1.** The TG curve of activated **1**.

**Figure S2.** Tertrlin oxidation at 60°C in MeCN; (a) with a catalyst; (b) filtrate (catalyst filtered off after 4 h of reaction)

**Figure S3.** The <sup>1</sup>H NMR(300M) spectra of three-component coupling of Ts-N<sub>3</sub>, PhCCH and (*i*-Pr)<sub>2</sub>NH in the presence of activated Cu<sup>II</sup>/Cu<sup>I</sup>-MOF in 1h.

**Figure S4** The <sup>1</sup>H NMR(300M) spectra of three-component coupling of Ts-N<sub>3</sub>, PhCCH and (*i*-Pr)<sub>2</sub>NH in the presence of activated Cu<sup>II</sup>/Cu<sup>I</sup>-MOF in 2h.

**Figure S5.** The <sup>1</sup>H NMR(300M) spectra of three-component coupling of Ts-N<sub>3</sub>, PhCCH and (*i*-Pr)<sub>2</sub>NH in the presence of activated Cu<sup>II</sup>/Cu<sup>I</sup>-MOF in 3h.

**Table S1.** Selected bond lengths (Å) and bond angles (°) for **1** and **2**.

---

|                    |        |            |                   | <b>1</b> |            |
|--------------------|--------|------------|-------------------|----------|------------|
| Cu(1)-N(3)         |        | 2.089(5)   | N(3)-Cu(1)-I(1)   |          | 104.76(16) |
| Cu(1)-I(1)         |        | 2.6454(10) | N(3)-Cu(1)-I(2)#1 |          | 108.40(15) |
| Cu(1)-I(2)#1       |        | 2.6554(10) | I(1)-Cu(1)-I(2)#1 |          | 116.55(3)  |
| Cu(1)-I(2)         |        | 2.086(5)   | N(3)-Cu(1)-I(2)   |          | 103.36(16) |
| Cu(2)-N(1)         |        | 2.080(5)   | I(1)-Cu(1)-I(2)   |          | 175.9(2)   |
| Cu(2)-I(1)#2       |        | 2.134(5)   | I(2)#1-Cu(1)-I(2) |          | 115.44(3)  |
| Cu(2)-I(1)#1       | Cu(2)- | 2.6284(10) | N(1)-Cu(2)-I(1)#2 |          | 108.38(17) |
| I(2)               |        | 2.7043(10) | N(1)-Cu(2)-I(1)#1 | N(1)-    | 108.48(16) |
| Cu(3)-O(1)         |        | 1.938(5)   | Cu(2)-I(2)        |          | 99.96(16)  |
| Cu(3)-O(8)#4       | Cu(3)- | 1.955(5)   | I(1)#2-Cu(2)-I(2) | O(1)-    | 103.87(3)  |
| N(4)#4             |        | 1.983(5)   | Cu(3)-O(8)#4      |          | 171.1(2)   |
| Cu(3)-N(2)         |        | 1.987(5)   | O(1)-Cu(3)-N(4)#4 | O(8)#4-  | 94.8(2)    |
| Cu(3)-O(1W)        |        | 2.222(6)   | Cu(3)-N(4)#4      |          | 83.1(2)    |
| O(8)#4-Cu(3)-O(1W) |        | 91.2(2)    | O(1)-Cu(3)-N(2)   |          | 83.5(2)    |
| N(4)#4-Cu(3)-O(1W) |        | 95.5(2)    | O(8)#4-Cu(3)-N(2) |          | 96.5(2)    |
| N(2)-Cu(3)-O(1W)   |        | 98.2(2)    | N(4)#4-Cu(3)-N(2) |          | 166.3(3)   |
| I(1)#1-Cu(2)-I(2)  |        | 114.77(4)  | O(1)-Cu(3)-O(1W)  |          | 97.6(2)    |

---

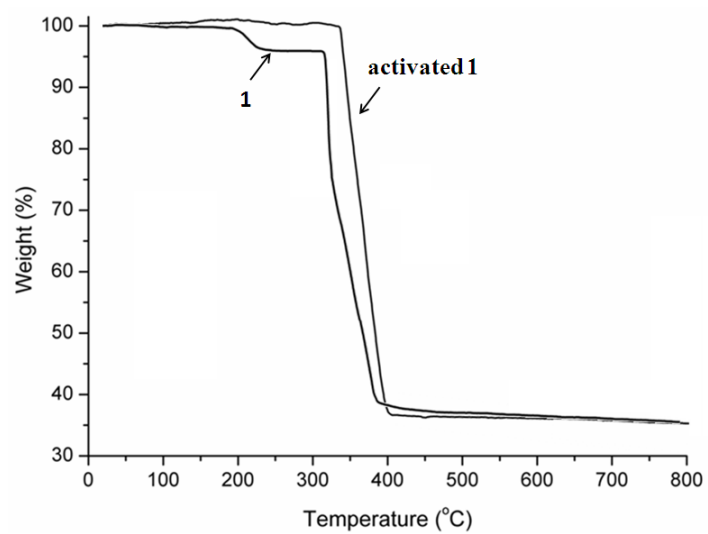

**Figure S1.** The TG curves of **1** and activated **1**.

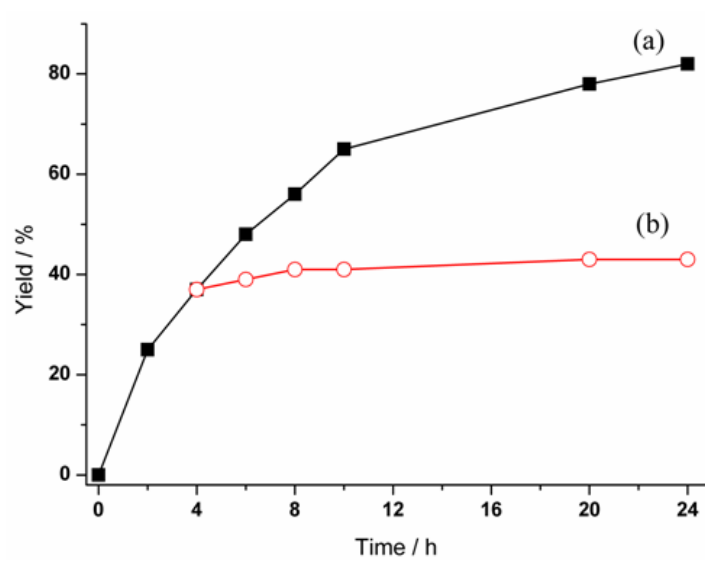

**Figure S2.** Tertlin oxidation at 60°C in MeCN; (a) with a catalyst; (b) filtrate (catalyst filtered off after 4 h of reaction)

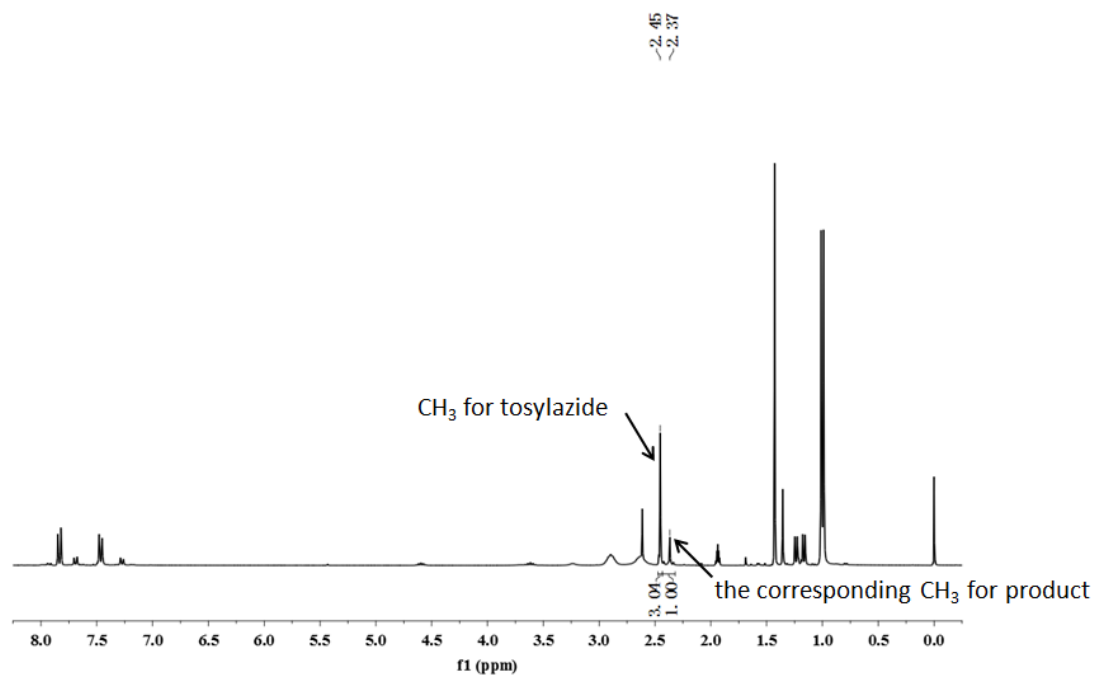

**Figure S3.** The <sup>1</sup>H NMR (300M) spectra of three-component coupling of Ts-N<sub>3</sub>, PhCCH and (*i*-Pr)<sub>2</sub>NH in the presence of activated Cu<sup>II</sup>/Cu<sup>I</sup>-MOF in 1h.

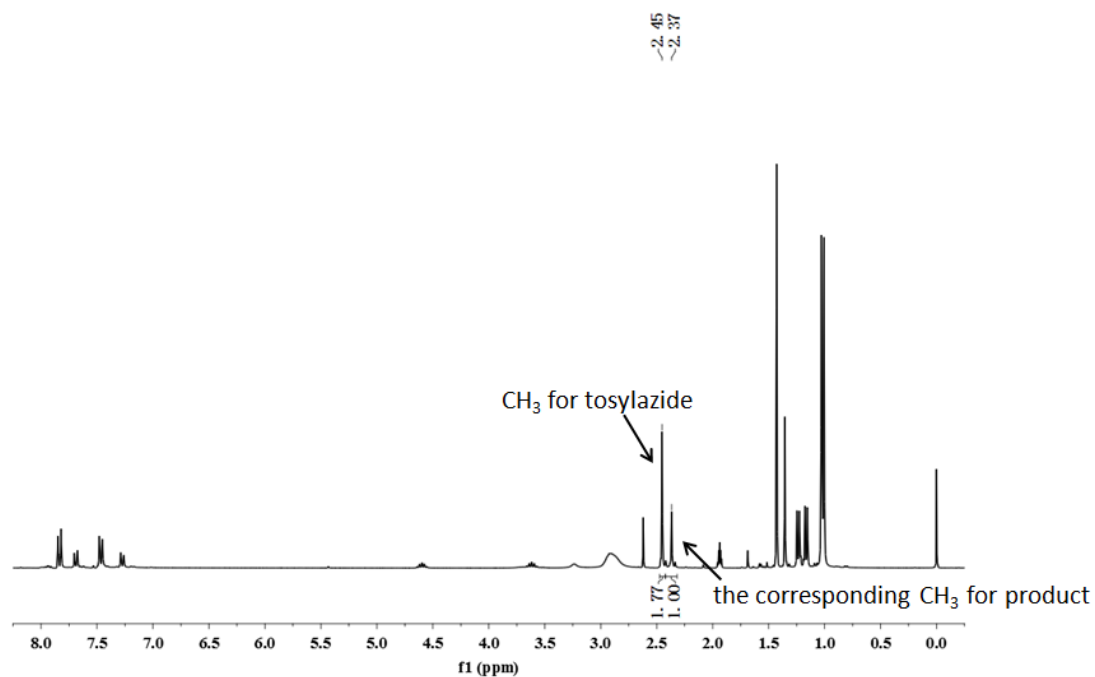

**Figure S4** The <sup>1</sup>H NMR (300M) spectra of three-component coupling of Ts-N<sub>3</sub>, PhCCH and (*i*-Pr)<sub>2</sub>NH in the presence of activated Cu<sup>II</sup>/Cu<sup>I</sup>-MOF in 2h.

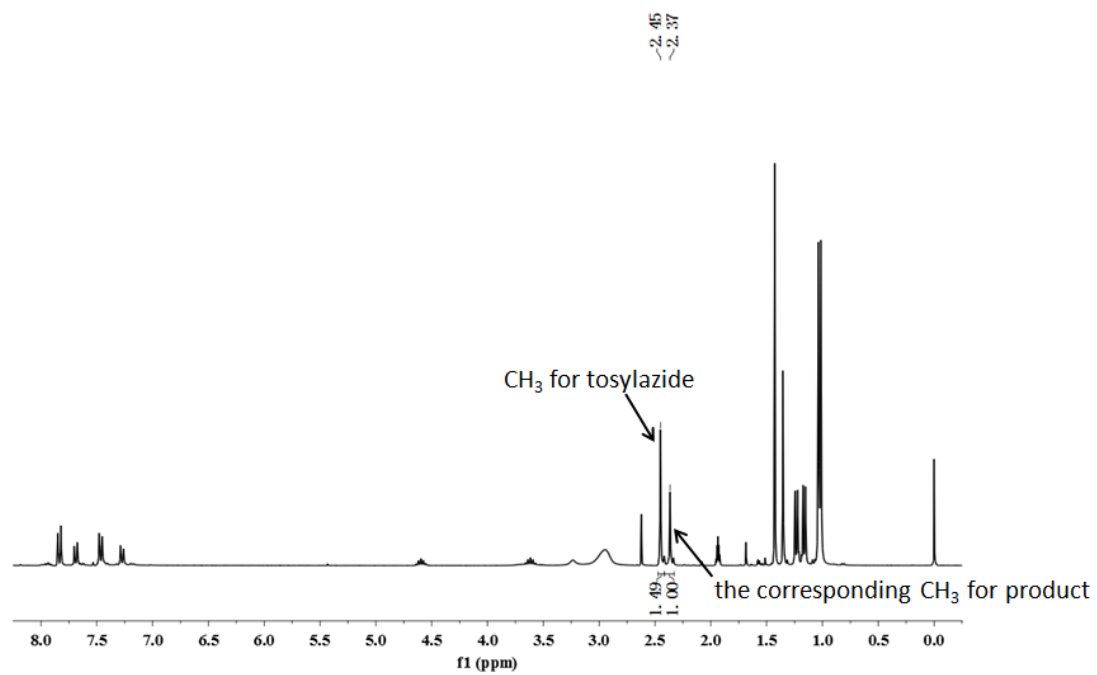

**Figure S5.** The  $^1\text{H}$  NMR (300M) spectra of three-component coupling of Ts-N<sub>3</sub>, PhCCH and (*i*-Pr)<sub>2</sub>NH in the presence of activated Cu<sup>II</sup>/Cu<sup>I</sup>-MOF in 3h.
